# Supplementary material for: Wildlife Hosts of <em>Leishmania Infantum</em> in a Re-Emerging Focus of Human Leishmaniasis, in Emilia-Romagna, Northeast Italy
Source: Preprints.org preprint supplement (doi:10.20944/preprints202210.0416.v1), 2022-10-27
Supplement: Supplementary file 3 [file supplementary]

## Sheet: Table S1
Order	Species	Reggio Emilia			Modena			Bologna			Ravenna			Forlì-Cesena			Rimini			Totale
		N° positive (n° tested)	Prevalence	95% C.I.	N° positive (n° tested)	Prevalence	95% C.I.	N° positive (n° tested)	Prevalence	95% C.I.	N° positive (n° tested)	Prevalence	95% C.I.	N° positive (n° tested)	Prevalence	95% C.I.	N° positive (n° tested)	Prevalence	95% C.I.	N° positive (n° tested)	Prevalence	95% C.I.
Artiodactyla	Red deer	1(2)	50.0	(1.3 - 98.7)	0(4)	0.0	(0.0 - 60.2)	0(2)	0.0	(0.0 - 84.2)	--	--	--	0(3)	0.0	(0.0 - 70.8)	--	--	--	1(11)	9.1	(0.2-41.3)
	Roe deer	0(7)	0.0	(0.0 – 41.0)	8(120)	6.7	(2.9 - 12.7)	10(107)	9.4	(4.6 - 16.5)	2(9)	22.2	(2.8 - 60.0)	14(44)	31.8	(18.6 - 47.6)	4(22)	18.2	(5.2 - 40.3)	38(309)	12.3	(8.9-16.5)
	Wild boar	0(62)	0.0	(0.0 - 5.8)	1(16)	6.3	(0.2 - 30.2)	6(62)	9.7	(3.6 - 19.9)	1(10)	10.0	(0.3 - 44.5)	0(10)	0.0	(0.0 - 30.9)	0(4)	0.0	(0.0 - 60.2)	8(164)	4.9	(2.1-9.4)
	Fallow deer	0(1)	0.0	(0.0 - 97.5)	0(1)	0.0	(0.0 - 97.5)	0(1)	0.0	(0.0 - 97.5)	0(10)	0.0	(0.0 - 30.9)	0(11)	0.0	(0.0-28.5)				0(24)	0	(0.0-14.2)
Carnivora	European badger	0(1)	0.0	(0.0 - 97.5)	0(17)	0.0	(0.0 - 19.5)	0(13)	0.0	(0.0 - 24.7)	0(4)	0.0	(0.0 - 60.2)	1(18)	5.6	(0.1 - 27.3)	0(6)	0.0	(0.0 - 45.9)	1(59)	1.7	(0.0-9.1)
	Red fox	0(81)	0.0	(0.0 - 4.5)	2(56)	3.6	(0.4 - 12.3)	4(68)	5.9	(1.6 - 14.4)	0(4)	0.0	(0.0 - 60.2)	6(83)	7.2	(2.7 - 15.1)	1(27)	3.7	(0.1 – 19.0)	13(319)	4.1	(2.2-6.9)
	Wolf	0(1)	0.0	(0.0 - 97.5)	--	--	--	0(7)	0.0	(0.0 – 41.0)	0(2)	0.0	(0.0 - 84.2)	1(4)	25.0	(0.6 - 80.6)	2(4)	50.0	(6.8 - 93.3)	3(18)	16.7	(3.6-41.4)
	Stone marten	0(1)	0.0	(0.0 - 97.5)				0(1)	0.0	(0.0 - 97.5)										0(2)	0	(0.0-84.2)
	Pine marten							0(1)	0.0	(0.0 - 97.5)										0(1)	0	(0.0-97.5)
	Raccoon				0(1)	0.0	(0.0 - 97.5)													0(1)	0	(0.0-97.5)
	Western polecat																0(1)	0.0	(0.0 - 97.5)	0(1)	0	(0.0-97.5)
Lagomorpha	European hare	--	--	--	0(16)	0.0	(0.0 - 20.6)	6(13)	46.2	(19.2 - 74.9)	--	--	--	0(2)	0.0	(0.0- 84.2)	0(8)	0.0	(0.0 - 36.9)	6(39)	15.4	(5.9-30.6)
Eulipotyphla	Hedgehog	0(2)	0.0	(0.0-84.2)	--	--	--	0(18)	0.0	(0.0-18.5)	--	--	--	0(1)	0.0	(0.0 - 97.5)	0(41)	0.0	(0.0 - 8.6)	0(62)	0	(0.0.-5.8)
Rodentia	Porcupine	0(4)	0.0	(0.0 - 60.2)	0(16)	0.0	(0.0 - 20.6)	1(11)	9.1	(0.2 - 41.3)	0(1)	0.0	(0.0 - 97.5)	0(12)	0.0	(0.0 - 26.5)	0(10)	0.0	(0.0 - 30.9)	1(54)	1.9	(0.1-9.9)
	Dormices				0(1)	0.0	(0.0 - 97.5)	0(2)	0.0	(0.0-84.2)							0(2)	0.0	(0.0-84.2)	0(5)	0	(0.0-52.2)
	Common dormouse																0(1)	0.0	(0.0 - 97.5)	0(1)	0	(0.0-97.5)
	Squirrel				0(2)	0.0	(0.0-84.2)	0(3)	0.0	(0.0-70.8)							0(2)	0.0	(0.0-84.2)	0(7)	0	(0.0-41.0)
Total		1(162)	0.6	(0.0 - 3.4)	11(250)	4.4	(2.2 - 7.7)	27(309)	8.7	(5.8 - 12.5)	3(40)	7.5	(1.6 - 20.4)	22(188)	11.7	(7.5 - 17.2)	7(128)	5.5	(2.2 - 10.9)	71(1077)	6.6	(5.2-8.2)
